# Supplementary material
Source: publisher figshare collection journal article supplement (https://gsajournals.figshare.com/articles/dataset/_/14673309)
Supplement: Supplementary file 2 [file 1]

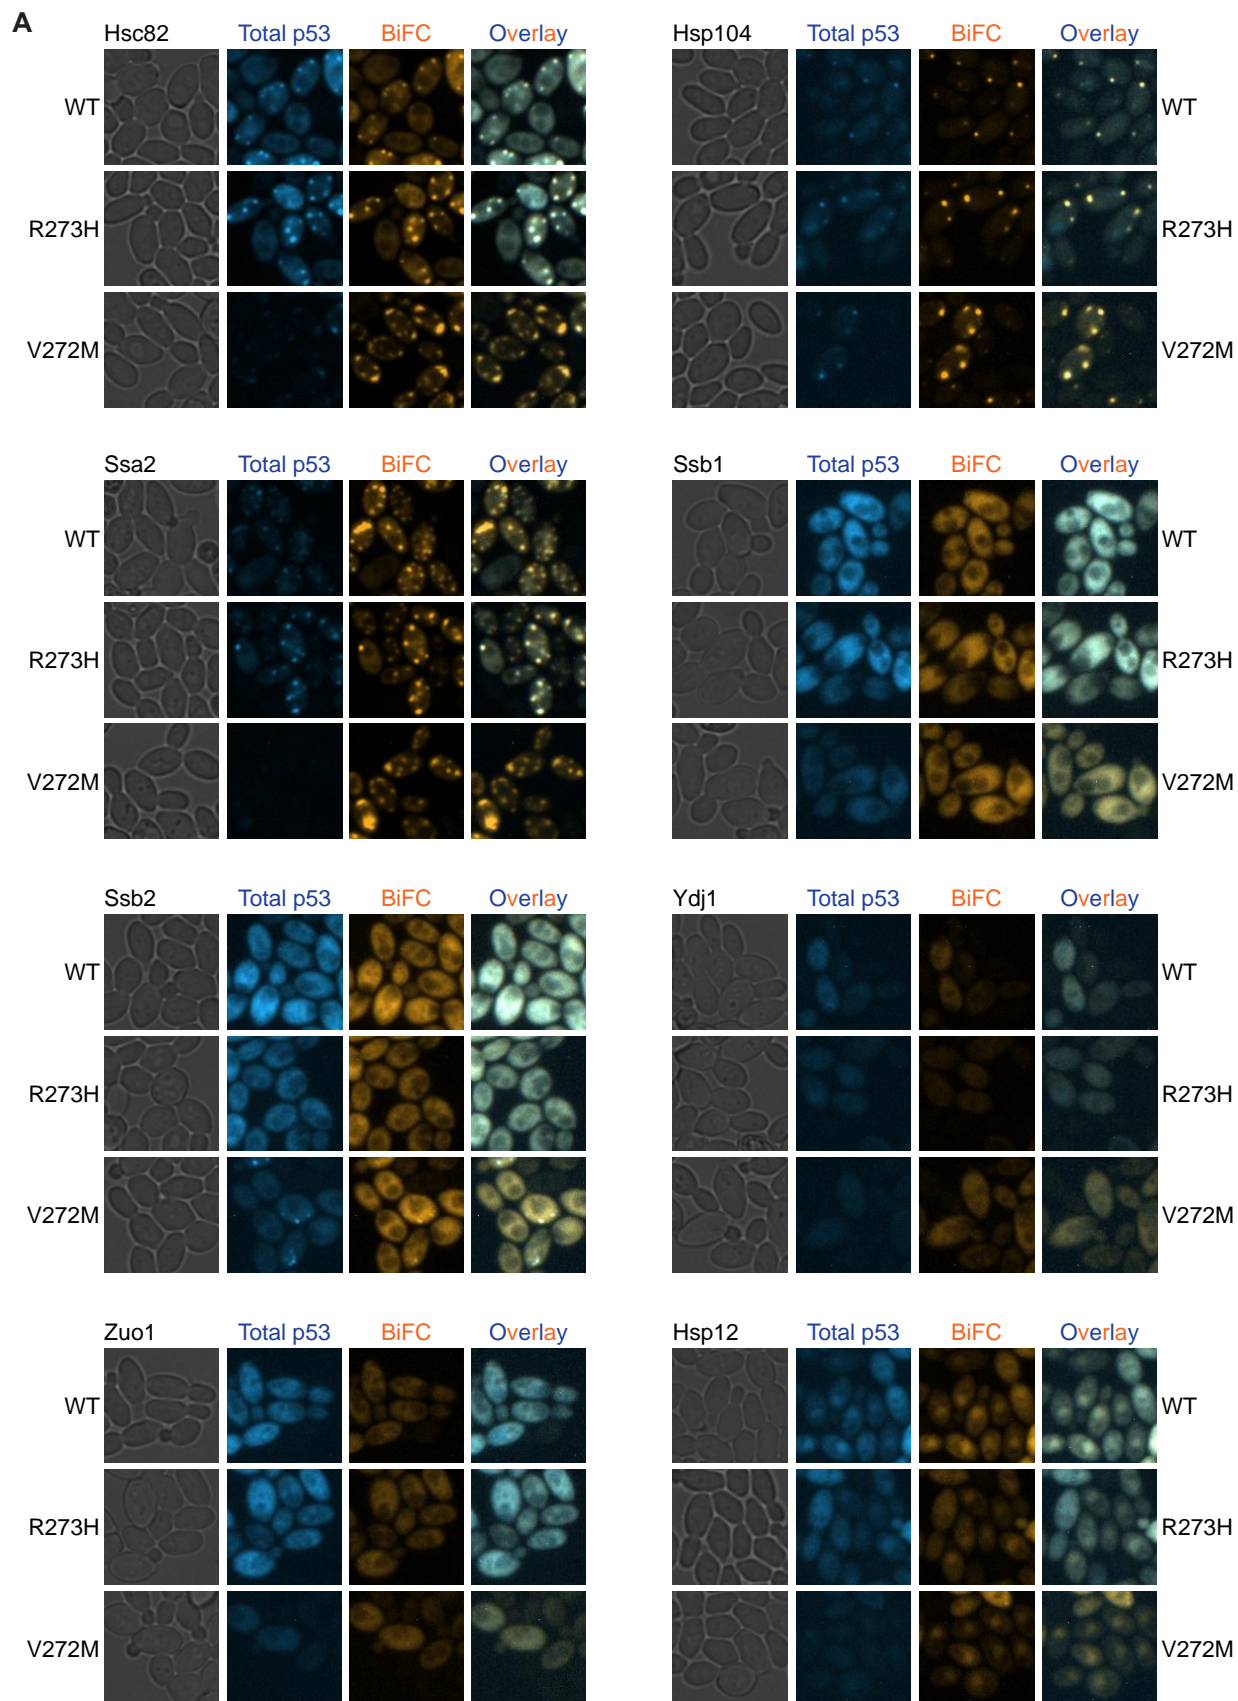

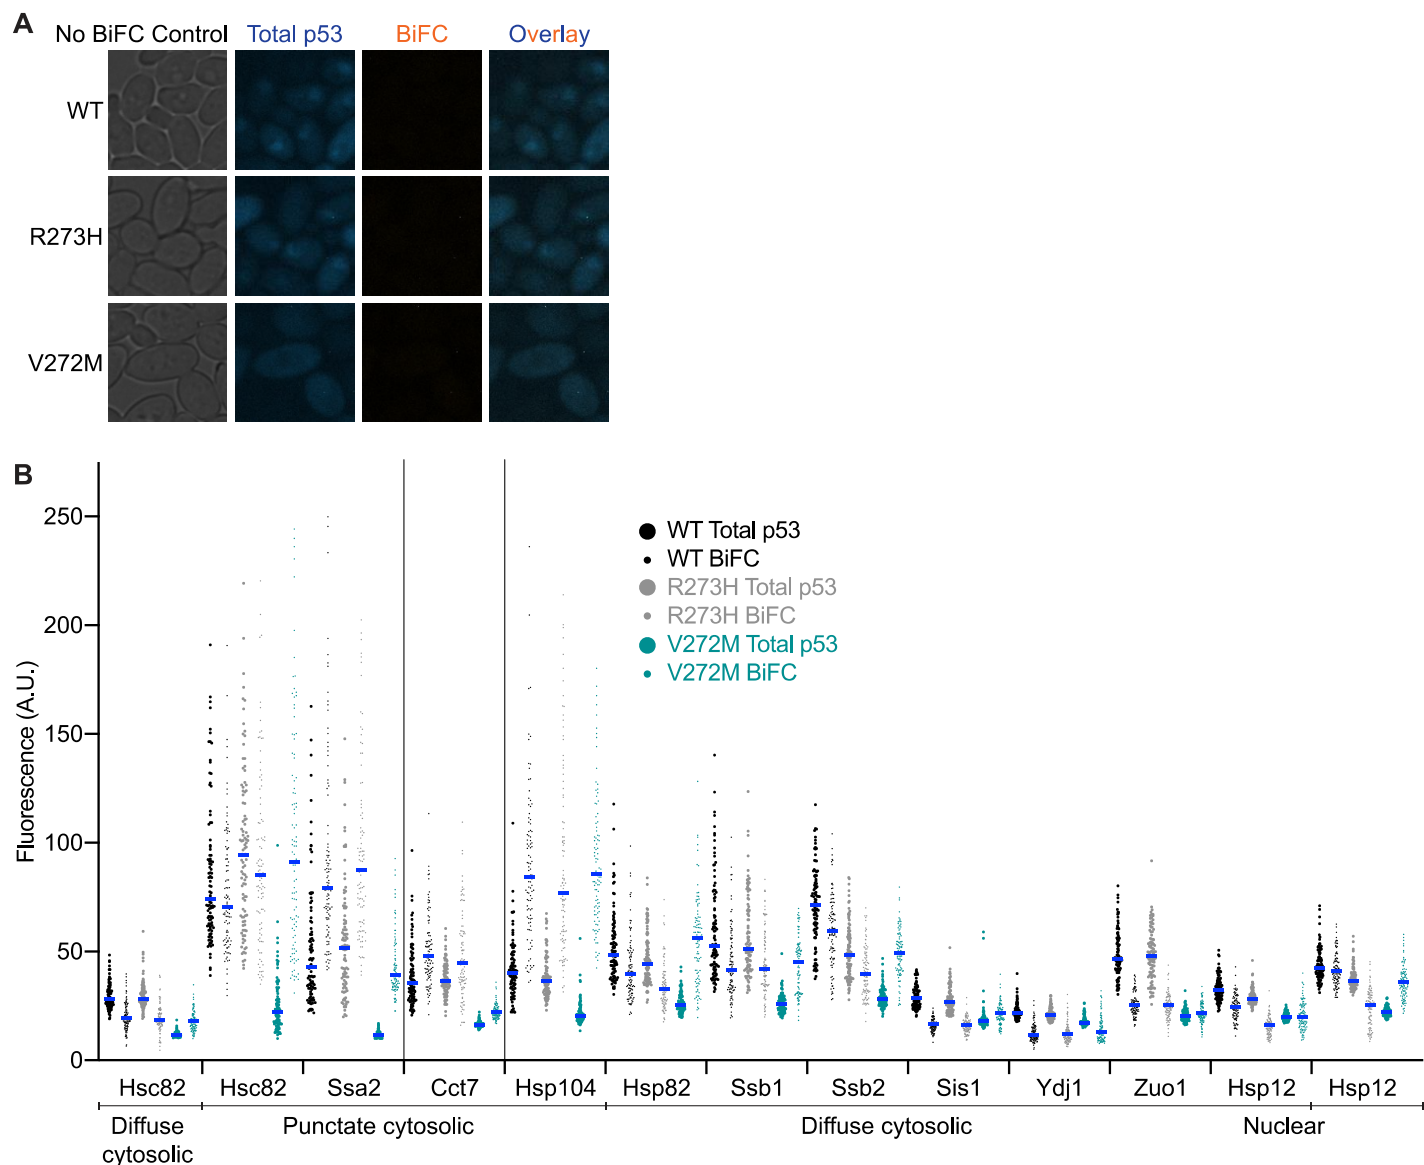

### Figure S4. Extended characterization of cytosolic chaperone-p53 interactions

(A) Representative micrographs of p53–chaperone BiFC interactions in cells expressing Hsc82-V<sub>N</sub>, Hsp104-V<sub>N</sub>, Ssa2-V<sub>N</sub>, Ssb1-V<sub>N</sub>, Ssb2-V<sub>N</sub>, Ydj1-V<sub>N</sub>, Zuo1-V<sub>N</sub>, Hsp12-V<sub>N</sub>, or in cells expressing empty vector (“No BiFC Control”), and carrying plasmids encoding the indicated p53-mKate2-V<sub>C</sub> alleles. Total p53 (mKate2) fluorescence images were false-colored blue and BiFC (Venus) fluorescence images were false-colored orange. Prior to overlay, brightness and contrast were adjusted equivalently for each set of images. Plasmids were pMAM110, “WT”, pMAM112, “R273H”; pMAM111, “V272M”; pRS316 (not labeled). Strains were diploids made by mating BY4742 cells carrying the p53-mKate2-V<sub>C</sub> plasmids with H00399, “Hsc82”; H00384, “Hsp104”; H00388, “Ssa2”; H00395, “Ssb1”; H00394, “Ssb2”; H00385, “Ydj1”; H00396, “Zuo1”; or H06684, “Hsp12”. “No BiFC Control” was a diploid made by mating BY4742 cells carrying the p53-mKate2-V<sub>C</sub> plasmids with BY4741 cells carrying pRS316. (B) Total p53 (mKate2) and BiFC (Venus) fluorescence in cells cultured at 30° carrying plasmids encoding the indicated p53-mKate2-V<sub>C</sub> alleles together with the indicated V<sub>N</sub>-tagged chaperone. Blue lines denote median values. Vertical lines group the samples imaged with the same settings (LED intensity and exposure time). The subcellular location where the BiFC interaction was quantified is indicated below. Plasmids were pMAM110, “WT”, pMAM112, “R273H”; pMAM111, “V272M”. Strains were diploids made by mating BY4742 cells carrying the plasmids with H00399, “Hsc82”; H00388, “Ssa2”; H00383, “Cct7”; H00384, “Hsp104”; H00398, “Hsp82”; H00395, “Ssb1”; H00394, “Ssb2”; H06680, “Sis1”; H00385, “Ydj1”; H00396, “Zuo1”; or H06684, “Hsp12”.
