# Supplementary material
Source: publisher figshare collection journal article supplement (https://gsajournals.figshare.com/articles/dataset/_/14673309)
Supplement: Supplementary file 3 [file 1]

**Table S2. Oligonucleotides used in this study**

| Oligo                   | Sequence 5'—3'                                                    |
|-------------------------|-------------------------------------------------------------------|
| CDC3-<br>F2(BiFC)       | CCACTCCCCCGTCCCTACAAAGAAGAAGGGATTTTTACGTGGTCGA<br>CGGATCCCCGGGT   |
| CDC3-<br>R1(BiFC)       | TAATAGTGTATGTTTGAAATTTTTATATGTCTTTATTTTCGTGATGAA<br>TTCGAGCTCGTT  |
| 5'TP53fw                | AGCCGCAGTCAGATCCTAGC                                              |
| midTP53fw               | CCTCCTCAGCATCTTATCCG                                              |
| TP53-vn_re              | TGGGAGGCTGTCAGTGGGGAACAAGAAGTGGAGAATGTCATTACT<br>GCTTGTCGGCGGTG   |
| TP53-vc_re              | TGGGAGGCTGTCAGTGGGGAACAAGAAGTGGAGAATGTCATTACT<br>TGTACAGCTCGTCC   |
| Pgal-p53-<br>Kate-Vx_re | ACAACAAAACACCAGTGCAGGCCAACTTGTTTCAGTGGAGCGCAAAT<br>GGAAGTCCTGGGTG |
| 5_pRS                   | GTGTCGGGGCTGGCTTAACTATGCGGCATCAGAGCAGATTGTACT<br>GAGAGTGCAC       |
| 3_pRS                   | ACAATTTCTCTGATGCGGTATTTTCTCCTTACGCATCTGTGCGGTATT<br>TCACACCG      |
