# Supplementary material
Source: publisher figshare collection journal article supplement (https://gsajournals.figshare.com/articles/dataset/_/14673309)
Supplement: Supplementary file 4 [file 1]

**Table 3. Plasmids used in this study**

| Plasmid                                      | Alias   | Origin                                                                                                                                                                                                                                  |
|----------------------------------------------|---------|-----------------------------------------------------------------------------------------------------------------------------------------------------------------------------------------------------------------------------------------|
| pMVB100                                      | N/A     | (Versele <i>et al.</i> 2004)                                                                                                                                                                                                            |
| pFA6a-V <sub>C</sub> -His3MX6                | G00019  | (Sung and Huh 2007)                                                                                                                                                                                                                     |
| YCpHU-Cdc3-V <sub>C</sub>                    | G00521  | pMVB100 was co-transformed into M-1622 with a V <sub>C</sub> -HisMX PCR product (primers CDC3-F2(BiFC) and CDC3-R1(BiFC), template pFA6a-V <sub>C</sub> -His3MX6) flanked by sequences targeting recombination with the Cdc3 C terminus |
| YCpHU-Cdc3(G365R)-V <sub>C</sub>             | G00522  | Created by site-directed mutagenesis from template plasmid YCpHU-Cdc3-V <sub>C</sub>                                                                                                                                                    |
| pCMV-p53(R249S), Neo                         | G00637  | Addgene Plasmid #16438 (Baker <i>et al.</i> 1990)                                                                                                                                                                                       |
| pEF1a-p53-mKate2-split_mVenus_C, Hyg         | p663    | (Gaglia and Lahav 2014)                                                                                                                                                                                                                 |
| pEF1a-p53(L344A)-mKate2-split_mVenus_C, Hyg  | p666    | (Gaglia and Lahav 2014)                                                                                                                                                                                                                 |
| pEF1a-p53(L344P)-mKate2-split_mVenus_C, Hyg  | p668    | (Gaglia and Lahav 2014)                                                                                                                                                                                                                 |
| pEF1a-p53-mKate2-split_mVenus_N, Neo         | p662    | (Gaglia and Lahav 2014)                                                                                                                                                                                                                 |
| pEF1a-p53(L344A)-mKate2-split_mVenus_N, Neo  | p665    | (Gaglia and Lahav 2014)                                                                                                                                                                                                                 |
| pEF1a-p53(L344P)-mKate2-split_mVenus_N, Neo  | p667    | (Gaglia and Lahav 2014)                                                                                                                                                                                                                 |
| pEF1a-p53-mKate2-mVenus, Neo                 | p675    | (Gaglia and Lahav 2014)                                                                                                                                                                                                                 |
| pEF1a-p53(L344A)-mKate2-mVenus, Neo          | p678    | (Gaglia and Lahav 2014)                                                                                                                                                                                                                 |
| pEF1a-p53(L344P)-mKate2-mVenus, Neo          | p679    | (Gaglia and Lahav 2014)                                                                                                                                                                                                                 |
| Pgal-p53-mKate2-V <sub>C</sub> , TRP1        | H3.29   | Cloned by homologous recombination of <i>Nco</i> I- and <i>Xma</i> I-digested RS314-H with PCR product of p663 (primers 5'TP53fw and Pgal-p53-Kate-Vx_re)                                                                               |
| Pgal-p53(V272M)-mKate2-V <sub>C</sub> , TRP1 | pMAM67  | Created by site-directed mutagenesis from template plasmid H3.29                                                                                                                                                                        |
| Pgal-p53(R273H)-mKate2-V <sub>C</sub> , TRP1 | pMAM68  | Created by site-directed mutagenesis from template plasmid H3.29                                                                                                                                                                        |
| Pgal-p53-mKate2-V <sub>C</sub> , LEU2        | pMAM110 | Marker swap ( <i>TRP1</i> to <i>LEU2</i> ) of H3.29                                                                                                                                                                                     |
| Pgal-p53(V272M)-mKate2-V <sub>C</sub> , LEU2 | pMAM111 | Marker swap ( <i>TRP1</i> to <i>LEU2</i> ) of pMAM67                                                                                                                                                                                    |
| Pgal-p53(R273H)-mKate2-V <sub>C</sub> , LEU2 | pMAM112 | Marker swap ( <i>TRP1</i> to <i>LEU2</i> ) of pMAM68                                                                                                                                                                                    |

|                                                  |         |                                                                                                                                                     |
|--------------------------------------------------|---------|-----------------------------------------------------------------------------------------------------------------------------------------------------|
| Pgal-p53(R273H), <i>TRP1</i>                     | RS314-H | Addgene Plasmid #17541<br>(Thiagalingam <i>et al.</i> 1995)                                                                                         |
| Padh1-p53-mKate2-Venus, <i>LEU2</i>              | pMAM85  | Cloned by homologous recombination of <i>Stul</i> -digested pLS76 and <i>Sspl</i> -digested PCR product of p675 (primers MidTP53fw and TP53-vc_re)  |
| Padh1-p53(V272M)-mKate2-Venus, <i>LEU2</i>       | pMAM86  | Cloned by homologous recombination of <i>Stul</i> -digested pMAM69 and <i>Sspl</i> -digested PCR product of p675 (primers MidTP53fw and TP53-vc_re) |
| Padh1-p53(R273H)-mKate2-Venus, <i>LEU2</i>       | pMAM87  | Cloned by homologous recombination of <i>Stul</i> -digested pMAM79 and <i>Sspl</i> -digested PCR product of p675 (primers MidTP53fw and TP53-vc_re) |
| Padh1-p53(V272M R273H)-mKate2-Venus, <i>LEU2</i> | pMAM104 | Cloned by homologous recombination of <i>Stul</i> -digested pMAM77 and <i>Sspl</i> -digested PCR product of p675 (primers MidTP53fw and TP53-vc_re) |
| Padh1-p53(L344A)-mKate2-Venus, <i>LEU2</i>       | pMAM105 | Cloned by homologous recombination of <i>Stul</i> -digested pLS76 and <i>Sspl</i> -digested PCR product of p678 (primers MidTP53fw and TP53re_Vc)   |
| Padh1-p53(L344P)-mKate2-Venus, <i>LEU2</i>       | pMAM106 | Cloned by homologous recombination of <i>Stul</i> -digested pLS76 and <i>Sspl</i> -digested PCR product of p679 (primers MidTP53fw and TP53re_Vc)   |
| Padh1-p53-mKate2-Vc, <i>LEU2</i>                 | pMAM82  | Cloned by homologous recombination of <i>Stul</i> -digested pLS76 and <i>Sspl</i> -digested PCR product of p663 (primers MidTP53fw and TP53re_Vc)   |
| Padh1-p53(V272M)-mKate2-Vc, <i>LEU2</i>          | pMAM83  | Cloned by homologous recombination of <i>Stul</i> -digested pMAM69 and <i>Sspl</i> -digested PCR product of p663 (primers MidTP53fw and TP53re_Vc)  |
| Padh1-p53(R273H)-mKate2-Vc, <i>LEU2</i>          | pMAM84  | Cloned by homologous recombination of <i>Stul</i> -digested pMAM79 and <i>Sspl</i> -digested PCR product of p663 (primers MidTP53fw and TP53re_Vc)  |
| Padh1-p53(L344A)-mKate2-Vc, <i>LEU2</i>          | pMAM91  | Cloned by homologous recombination of <i>Stul</i> -digested pLS76 and <i>Sspl</i> -digested PCR product of p666 (primers MidTP53fw and TP53re_Vc)   |
| Padh1-p53(L344P)-mKate2-Vc, <i>LEU2</i>          | pMAM93  | Cloned by homologous recombination of <i>Stul</i> -digested pLS76 and <i>Sspl</i> -                                                                 |

|                                                      |         |                                                                                                                                                                                                                     |
|------------------------------------------------------|---------|---------------------------------------------------------------------------------------------------------------------------------------------------------------------------------------------------------------------|
| Padh1-p53-mKate2-V <sub>N</sub> ,<br><i>LEU2</i>     | pMAM90  | digested PCR product of p668 (primers MidTP53fw and TP53re_Vc)<br>Cloned by homologous recombination of <i>Stul</i> -digested pLS76 and <i>Sspl</i> -digested PCR product of p662 (primers MidTP53fw and TP53re_Vn) |
| Padh1-p53(L344A)-mKate2-V <sub>N</sub> , <i>LEU2</i> | pMAM92  | Cloned by homologous recombination of <i>Stul</i> -digested pLS76 and <i>Sspl</i> -digested PCR product of p665 (primers MidTP53fw and TP53re_Vn)                                                                   |
| Padh1-p53(L344P)-mKate2-V <sub>N</sub> , <i>LEU2</i> | pMAM94  | Cloned by homologous recombination of <i>Stul</i> -digested pLS76 and <i>Sspl</i> -digested PCR product of p667 (primers MidTP53fw and TP53re_Vn)                                                                   |
| Padh1-p53-mKate2-V <sub>N</sub> ,<br><i>TRP1</i>     | pMAM98  | Marker swap ( <i>LEU2</i> to <i>TRP1</i> ) of pMAM90                                                                                                                                                                |
| Padh1-p53(L344A)-mKate2-V <sub>N</sub> , <i>TRP1</i> | pMAM99  | Marker swap ( <i>LEU2</i> to <i>TRP1</i> ) of pMAM92                                                                                                                                                                |
| Padh1-p53(L344P)-mKate2-V <sub>N</sub> , <i>TRP1</i> | pMAM100 | Marker swap ( <i>LEU2</i> to <i>TRP1</i> ) of pMAM94                                                                                                                                                                |
| Padh1-p53, <i>TRP1</i>                               | pMAM78  | Marker swap ( <i>LEU2</i> to <i>TRP1</i> ) of pLS76 (Ishioka <i>et al.</i> 1993)                                                                                                                                    |
| Padh1-p53, <i>LEU2</i>                               | pLS76   |                                                                                                                                                                                                                     |
| Padh1-p53(V272M), <i>LEU2</i>                        | pMAM69  | Created by site-directed mutagenesis from template plasmid pLS76                                                                                                                                                    |
| Padh1-p53(R273H), <i>LEU2</i>                        | pMAM79  | Cloned by gap repair of <i>NcoI</i> - and <i>Stul</i> -digested pLS76 with RS314-H                                                                                                                                  |
| Padh1-p53(V272M R273H),<br><i>LEU2</i>               | pMAM77  | Created by site-directed mutagenesis from template plasmid pMAM69                                                                                                                                                   |
| Padh1-p53(L344A), <i>LEU2</i>                        | pMAM114 | Cloned by gap repair of <i>NcoI</i> - and <i>Stul</i> -digested pMAM79 with pMAM99                                                                                                                                  |
| Padh1-p53(L344P), <i>LEU2</i>                        | pMAM115 | Cloned by gap repair of <i>NcoI</i> - and <i>Stul</i> -digested pMAM79 with pMAM100                                                                                                                                 |
| Pgal-HSP82-TAP, <i>URA3</i>                          | G00613  | Yeast ORF Collection (Gelperin <i>et al.</i> 2005)                                                                                                                                                                  |
| Pgal-HSC82-TAP, <i>URA3</i>                          | G00791  | Yeast ORF Collection (Gelperin <i>et al.</i> 2005)                                                                                                                                                                  |
| Pgal-HSP104-TAP, <i>URA3</i>                         | G00614  | Yeast ORF Collection (Gelperin <i>et al.</i> 2005)                                                                                                                                                                  |
| Pgal-SSA2-TAP, <i>URA3</i>                           | G00622  | Yeast ORF Collection (Gelperin <i>et al.</i> 2005)                                                                                                                                                                  |
| Pgal-SSA4-TAP, <i>URA3</i>                           | G00790  | Yeast ORF Collection (Gelperin <i>et al.</i> 2005)                                                                                                                                                                  |
| Pgal-SSB2-TAP, <i>URA3</i>                           | G00621  | Yeast ORF Collection (Gelperin <i>et al.</i> 2005)                                                                                                                                                                  |
| Pgal-HSP12-TAP, <i>URA3</i>                          | G00617  | Yeast ORF Collection (Gelperin <i>et al.</i> 2005)                                                                                                                                                                  |

|                              |        |                                                      |
|------------------------------|--------|------------------------------------------------------|
| Pgal-HSP26-TAP, <i>URA3</i>  | G00618 | Yeast ORF Collection (Gelperin <i>et al.</i> 2005)   |
| Pgal-HSP31-TAP, <i>URA3</i>  | G00619 | Yeast ORF Collection (Gelperin <i>et al.</i> 2005)   |
| Pgal-SIS1-TAP, <i>URA3</i>   | G00615 | Yeast ORF Collection (Gelperin <i>et al.</i> 2005)   |
| Pgal-YDJ1-TAP, <i>URA3</i>   | G00353 | Yeast ORF Collection (Gelperin <i>et al.</i> 2005)   |
| Pgal-ZUO1-TAP, <i>URA3</i>   | G00616 | Yeast ORF Collection (Gelperin <i>et al.</i> 2005)   |
| Pgal-CCT7-TAP, <i>URA3</i>   | G00620 | Yeast ORF Collection (Gelperin <i>et al.</i> 2005)   |
| Pgal-HSP82-TAP, <i>TRP1</i>  | G00630 | Marker swap ( <i>URA3</i> to <i>TRP1</i> ) of G00613 |
| Pgal-HSC82-TAP, <i>TRP1</i>  | G00799 | Marker swap ( <i>URA3</i> to <i>TRP1</i> ) of G00791 |
| Pgal-HSP104-TAP, <i>TRP1</i> | G00631 | Marker swap ( <i>URA3</i> to <i>TRP1</i> ) of G00614 |
| Pgal-SSA2-TAP, <i>TRP1</i>   | G00633 | Marker swap ( <i>URA3</i> to <i>TRP1</i> ) of G00622 |
| Pgal-SSA4-TAP, <i>TRP1</i>   | G00789 | Marker swap ( <i>URA3</i> to <i>TRP1</i> ) of G00790 |
| Pgal-SSB2-TAP, <i>TRP1</i>   | G00634 | Marker swap ( <i>URA3</i> to <i>TRP1</i> ) of G00621 |
| Pgal-HSP12-TAP, <i>TRP1</i>  | G00627 | Marker swap ( <i>URA3</i> to <i>TRP1</i> ) of G00617 |
| Pgal-HSP26-TAP, <i>TRP1</i>  | G00628 | Marker swap ( <i>URA3</i> to <i>TRP1</i> ) of G00618 |
| Pgal-HSP31-TAP, <i>TRP1</i>  | G00629 | Marker swap ( <i>URA3</i> to <i>TRP1</i> ) of G00619 |
| Pgal-SIS1-TAP, <i>TRP1</i>   | G00632 | Marker swap ( <i>URA3</i> to <i>TRP1</i> ) of G00615 |
| Pgal-YDJ1-TAP, <i>TRP1</i>   | G00800 | Marker swap ( <i>URA3</i> to <i>TRP1</i> ) of G00353 |
| Pgal-ZUO1-TAP, <i>TRP1</i>   | G00635 | Marker swap ( <i>URA3</i> to <i>TRP1</i> ) of G00616 |
| Pgal-CCT7-TAP, <i>TRP1</i>   | G00626 | Marker swap ( <i>URA3</i> to <i>TRP1</i> ) of G00620 |
| HSF1 $\Delta$ N, <i>TRP1</i> | G00061 | (Park <i>et al.</i> 2006)                            |
| pRS305, <i>LEU2</i>          | N/A    | (Sikorski and Hieter 1989)                           |
| pRS306, <i>URA3</i>          | N/A    | (Sikorski and Hieter 1989)                           |
| pRS314, <i>TRP1</i>          | N/A    | (Sikorski and Hieter 1989)                           |
| pRS316, <i>URA3</i>          | N/A    | (Sikorski and Hieter 1989)                           |
| pRS403, <i>TRP1</i>          | N/A    | (Brachmann <i>et al.</i> 1998)                       |
| pRS415, <i>LEU2</i>          | N/A    | (Brachmann <i>et al.</i> 1998)                       |
| pRS424, <i>TRP1</i>          | N/A    | (Christianson <i>et al.</i> 1992)                    |

---

Marker swapping was accomplished by PCR with 5\_pRS and 3\_pRS of the relevant marker gene from pRS305 for *LEU2*, pRS306 for *URA3*, or pRS404 for *TRP1*, followed by co-transformation of the new-marker PCR product and original-marker plasmid into yeast harboring a deletion of the new marker (BY4741 for *LEU2* or *URA3*, Y0134 for *TRP1*). Selection for the new marker was followed by yeast DNA extraction and rescue of the marker-swapped plasmid in DH5 $\alpha$ .

## Literature cited

- Baker S. J., S. Markowitz, E. R. Fearon, J. K. Willson, and B. Vogelstein, 1990  
Suppression of human colorectal carcinoma cell growth by wild-type p53.  
*Science* 249: 912–915. <https://doi.org/10.1126/science.2144057>
- Brachmann C. B., A. Davies, G. J. Cost, E. Caputo, J. Li, *et al.*, 1998 Designer deletion strains derived from *Saccharomyces cerevisiae* S288C: a useful set of strains and plasmids for PCR-mediated gene disruption and other applications. *Yeast* 14: 115–132. [https://doi.org/10.1002/\(SICI\)1097-0061\(19980130\)14:2<115::AID-YEA204>3.0.CO;2-2](https://doi.org/10.1002/(SICI)1097-0061(19980130)14:2<115::AID-YEA204>3.0.CO;2-2)
- Christianson T. W., R. S. Sikorski, M. Dante, J. H. Shero, and P. Hieter, 1992  
Multifunctional yeast high-copy-number shuttle vectors. *Gene* 110: 119–122.  
[https://doi.org/10.1016/0378-1119\(92\)90454-w](https://doi.org/10.1016/0378-1119(92)90454-w)
- Gaglia G., and G. Lahav, 2014 Constant rate of p53 tetramerization in response to DNA damage controls the p53 response. *Molecular Systems Biology* 10: 753.  
<https://doi.org/10.15252/msb.20145168>
- Gelperin D. M., M. A. White, M. L. Wilkinson, Y. Kon, L. A. Kung, *et al.*, 2005  
Biochemical and genetic analysis of the yeast proteome with a movable ORF collection. *Genes Dev* 19: 2816–2826. <https://doi.org/10.1101/gad.1362105>
- Ishioka C., T. Frebourg, Y. X. Yan, M. Vidal, S. H. Friend, *et al.*, 1993 Screening patients for heterozygous p53 mutations using a functional assay in yeast. *Nat Genet* 5: 124–129. <https://doi.org/10.1038/ng1093-124>
- Park K.-W., J.-S. Hahn, Q. Fan, D. J. Thiele, and L. Li, 2006 De novo appearance and “strain” formation of yeast prion [PSI<sup>+</sup>] are regulated by the heat-shock transcription factor. *Genetics* 173: 35–47.  
<https://doi.org/10.1534/genetics.105.054221>
- Sikorski R. S., and P. Hieter, 1989 A system of shuttle vectors and yeast host strains designed for efficient manipulation of DNA in *Saccharomyces cerevisiae*. *Genetics* 122: 19–27.
- Sung M.-K., and W.-K. Huh, 2007 Bimolecular fluorescence complementation analysis system for in vivo detection of protein-protein interaction in *Saccharomyces cerevisiae*. *Yeast* 24: 767–775. <https://doi.org/10.1002/yea.1504>

Thiagalingam S., K. W. Kinzler, and B. Vogelstein, 1995 PAK1, a gene that can regulate p53 activity in yeast. *Proc Natl Acad Sci U S A* 92: 6062–6066.  
<https://doi.org/10.1073/pnas.92.13.6062>

Versele M., B. Gullbrand, M. J. Shulewitz, V. J. Cid, S. Bahmanyar, *et al.*, 2004 Protein-protein interactions governing septin heteropentamer assembly and septin filament organization in *Saccharomyces cerevisiae*. *Mol Biol Cell* 15: 4568–83.  
<https://doi.org/10.1091/mbc.E04-04-0330>
