# Supplementary material
Source: publisher figshare collection journal article supplement (https://gsajournals.figshare.com/articles/dataset/_/14673309)
Supplement: Supplementary file 5 [file 1]

**Table S1. Yeast Strains used in this study**

| Strain  | Genotype                                                                                | Origin                                                                                   |
|---------|-----------------------------------------------------------------------------------------|------------------------------------------------------------------------------------------|
| BY4741  | <i>MATa his3Δ1 leu2Δ0 met25Δ0 ura3Δ0</i>                                                | <i>Saccharomyces cerevisiae</i> (ATCC® 201388™)                                          |
| BY4742  | <i>MATα his3Δ1 leu2Δ0 lys2Δ0 ura3Δ0</i>                                                 | <i>Saccharomyces cerevisiae</i> (ATCC® 201389™)                                          |
| MMY0266 | <i>MATα cdc10(D182N)-Vc::KanMX his3Δ1 leu2Δ0 met25Δ0 ura3Δ0</i>                         | (Weems and McMurray 2017)                                                                |
| YO802   | <i>MATα his3 leu2 lys2 trp1 ura3 CDC12-Vc::KanMX</i>                                    | (Oh et al. 2013)                                                                         |
| YO685   | <i>MATα his3 leu2 lys2 trp1 ura3 CDC3-Vc::HIS3MX</i>                                    | (Oh et al. 2013)                                                                         |
| YO1057  | <i>MATα his3 leu2 lys2 trp1 ura3 CDC10-Vc::TRP1</i>                                     | (Oh et al. 2013)                                                                         |
| YO671   | <i>MATα his3 leu2 lys2 trp1 ura3 CDC11-Vc::HIS3MX</i>                                   | (Oh et al. 2013)                                                                         |
| YO619   | <i>MATα his3 leu2 lys2 trp1 ura3 SHS1-Vc::HIS3MX</i>                                    | (Oh et al. 2013)                                                                         |
| M-1622  | <i>MATα his3 leu2 lys2 trp1 ura3 cdc3(G365R)</i>                                        | (Nagaraj et al. 2008)                                                                    |
| RBy33   | <i>MATa his3Δ200 leu2Δ1 lys2Δ202 trp1Δ63 1cUAS53::URA3</i>                              | (Brachmann et al. 1996)                                                                  |
| RBy159  | <i>MATα his3Δ200 leu2Δ1 lys2Δ202 trp1Δ63 1cUAS53::URA3</i>                              | (Brachmann et al. 1996)                                                                  |
| yIG397  | <i>MATa ade2-1 can1-100 his3-11,15 leu2-3,112 trp1-1 ura3-1 URA3 3XRGC::pCYC1::ADE2</i> | (Ishioka et al. 1993)                                                                    |
| yJM3164 | <i>MATa his3Δ200 HTB2-mNeonGreen::HIS3 leu2Δ1 lys2-801 trp1Δ63 ura3-52</i>              | Gift from Jeff Moore                                                                     |
| yJM1838 | <i>MATα his3Δ200 leu2Δ1 lys2-801 trp1Δ63 ura3-52</i>                                    | Gift from Jeff Moore                                                                     |
| JTY4204 | <i>MATa gal2 leu2 pep4-3 prb1-1122 prc1-451 trp1Δ63 ura3</i>                            | (Jones 1977)                                                                             |
| TH5     | <i>MATa leu2-3,112 trp1 tup1 ura3-52 dfr1::URA3</i>                                     | (Huang et al. 1992)                                                                      |
| Y0134   | <i>MATa his3Δ1 leu2Δ0 met25Δ0 trp1Δ::KanMX ura3Δ0</i>                                   | <i>Saccharomyces</i> Genome Deletion Project (Winzeler et al. 1999; Giaever et al. 2002) |
| H00398  | <i>MATa his3Δ1 HSP82-VN::KIURA3 leu2Δ0 met25Δ0 ura3Δ0</i>                               | <i>S. cerevisiae</i> VN-Fusion Library (Sung et al. 2013)                                |
| H00399  | <i>MATa his3Δ1 HSC82-VN::KIURA3 leu2Δ0 met25Δ0 ura3Δ0</i>                               | <i>S. cerevisiae</i> VN-Fusion Library (Sung et al. 2013)                                |

| Strain | Genotype                                                              | Origin                                                                        |
|--------|-----------------------------------------------------------------------|-------------------------------------------------------------------------------|
| H00384 | <i>MATa his3Δ1 HSP104-V<sub>N</sub>::KIURA3 leu2Δ0 met25Δ0 ura3Δ0</i> | <i>S. cerevisiae</i> V <sub>N</sub> -Fusion Library (Sung <i>et al.</i> 2013) |
| H00387 | <i>MATa his3Δ1 leu2Δ0 met25Δ0 SSA1-V<sub>N</sub>::KIURA3 ura3Δ0</i>   | <i>S. cerevisiae</i> V <sub>N</sub> -Fusion Library (Sung <i>et al.</i> 2013) |
| H00388 | <i>MATa his3Δ1 leu2Δ0 met25Δ0 SSA2-V<sub>N</sub>::KIURA3 ura3Δ0</i>   | <i>S. cerevisiae</i> V <sub>N</sub> -Fusion Library (Sung <i>et al.</i> 2013) |
| H00403 | <i>MATa his3Δ1 leu2Δ0 met25Δ0 SSA3-V<sub>N</sub>::KIURA3 ura3Δ0</i>   | <i>S. cerevisiae</i> V <sub>N</sub> -Fusion Library (Sung <i>et al.</i> 2013) |
| H00404 | <i>MATa his3Δ1 leu2Δ0 met25Δ0 SSA4-V<sub>N</sub>::KIURA3 ura3Δ0</i>   | <i>S. cerevisiae</i> V <sub>N</sub> -Fusion Library (Sung <i>et al.</i> 2013) |
| H00395 | <i>MATa his3Δ1 leu2Δ0 met25Δ0 SSB1-V<sub>N</sub>::KIURA3 ura3Δ0</i>   | <i>S. cerevisiae</i> V <sub>N</sub> -Fusion Library (Sung <i>et al.</i> 2013) |
| H00394 | <i>MATa his3Δ1 leu2Δ0 met25Δ0 SSB2-V<sub>N</sub>::KIURA3 ura3Δ0</i>   | <i>S. cerevisiae</i> V <sub>N</sub> -Fusion Library (Sung <i>et al.</i> 2013) |
| H00383 | <i>MATa CCT7-V<sub>N</sub>::KIURA3 his3Δ1 leu2Δ0 met25Δ0 ura3Δ0</i>   | <i>S. cerevisiae</i> V <sub>N</sub> -Fusion Library (Sung <i>et al.</i> 2013) |
| H00526 | <i>CCT7-V<sub>N</sub>::URA3 CDC3-V<sub>C</sub>::HIS3MX</i>            | Spore clone from YO685 x H00383 cross                                         |
| H04802 | <i>MATa GIM3-V<sub>N</sub>::KIURA3 his3Δ1 leu2Δ0 met25Δ0 ura3Δ0</i>   | <i>S. cerevisiae</i> V <sub>N</sub> -Fusion Library (Sung <i>et al.</i> 2013) |
| H00385 | <i>MATa his3Δ1 leu2Δ0 met25Δ0 ura3Δ0 YDJ1-V<sub>N</sub>::KIURA3</i>   | <i>S. cerevisiae</i> V <sub>N</sub> -Fusion Library (Sung <i>et al.</i> 2013) |
| H00396 | <i>MATa his3Δ1 leu2Δ0 met25Δ0 ura3Δ0 ZUO1-V<sub>N</sub>::KIURA3</i>   | <i>S. cerevisiae</i> V <sub>N</sub> -Fusion Library (Sung <i>et al.</i> 2013) |
| H06680 | <i>MATa his3Δ1 leu2Δ0 met25Δ0 SIS1-V<sub>N</sub>::KIURA3 ura3Δ0</i>   | <i>S. cerevisiae</i> V <sub>N</sub> -Fusion Library (Sung <i>et al.</i> 2013) |
| H06674 | <i>MATa APJ1-V<sub>N</sub>::KIURA3 his3Δ1 leu2Δ0 met25Δ0 ura3Δ0</i>   | <i>S. cerevisiae</i> V <sub>N</sub> -Fusion Library (Sung <i>et al.</i> 2013) |
| H05926 | <i>MATa DJP1-V<sub>N</sub>::KIURA3 his3Δ1 leu2Δ0 met25Δ0 ura3Δ0</i>   | <i>S. cerevisiae</i> V <sub>N</sub> -Fusion Library (Sung <i>et al.</i> 2013) |
| H06675 | <i>MATa his3Δ1 leu2Δ0 met25Δ0 ura3Δ0 JJJ1-V<sub>N</sub>::KIURA3</i>   | <i>S. cerevisiae</i> V <sub>N</sub> -Fusion Library (Sung <i>et al.</i> 2013) |
| H06685 | <i>MATa his3Δ1 leu2Δ0 met25Δ0 ura3Δ0 JJJ2-V<sub>N</sub>::KIURA3</i>   | <i>S. cerevisiae</i> V <sub>N</sub> -Fusion Library (Sung <i>et al.</i> 2013) |
| H00400 | <i>MATa his3Δ1 leu2Δ0 met25Δ0 ura3Δ0 SSE2-V<sub>N</sub>::KIURA3</i>   | <i>S. cerevisiae</i> V <sub>N</sub> -Fusion Library (Sung <i>et al.</i> 2013) |
| H06681 | <i>MATa his3Δ1 leu2Δ0 met25Δ0 ura3Δ0 SSZ1-V<sub>N</sub>::KIURA3</i>   | <i>S. cerevisiae</i> V <sub>N</sub> -Fusion Library (Sung <i>et al.</i> 2013) |
| H06682 | <i>MATa his3Δ1 leu2Δ0 met25Δ0 ura3Δ0 SWA2-V<sub>N</sub>::KIURA3</i>   | <i>S. cerevisiae</i> V <sub>N</sub> -Fusion Library (Sung <i>et al.</i> 2013) |
| H06683 | <i>MATa his3Δ1 leu2Δ0 met25Δ0 ura3Δ0 SNO4-V<sub>N</sub>::KIURA3</i>   | <i>S. cerevisiae</i> V <sub>N</sub> -Fusion Library (Sung <i>et al.</i> 2013) |

| Strain | Genotype                                                             | Origin                                                                        |
|--------|----------------------------------------------------------------------|-------------------------------------------------------------------------------|
| H06684 | <i>MATa his3Δ1 leu2Δ0 met25Δ0 ura3Δ0 HSP12-V<sub>N</sub>::KIURA3</i> | <i>S. cerevisiae</i> V <sub>N</sub> -Fusion Library (Sung <i>et al.</i> 2013) |
| H04024 | <i>MATa his3Δ1 leu2Δ0 met25Δ0 ura3Δ0 HSP26-V<sub>N</sub>::KIURA3</i> | <i>S. cerevisiae</i> V <sub>N</sub> -Fusion Library (Sung <i>et al.</i> 2013) |
| H00397 | <i>MATa his3Δ1 HSP31-V<sub>N</sub>::KIURA3 leu2Δ0 met25Δ0 ura3Δ0</i> | <i>S. cerevisiae</i> V <sub>N</sub> -Fusion Library (Sung <i>et al.</i> 2013) |
| H00397 | <i>MATa his3Δ1 HSP32-V<sub>N</sub>::KIURA3 leu2Δ0 met25Δ0 ura3Δ0</i> | <i>S. cerevisiae</i> V <sub>N</sub> -Fusion Library (Sung <i>et al.</i> 2013) |
| H06677 | <i>MATa his3Δ1 HSP33-V<sub>N</sub>::KIURA3 leu2Δ0 met25Δ0 ura3Δ0</i> | <i>S. cerevisiae</i> V <sub>N</sub> -Fusion Library (Sung <i>et al.</i> 2013) |
| H06676 | <i>MATa his3Δ1 HSP42-V<sub>N</sub>::KIURA3 leu2Δ0 met25Δ0 ura3Δ0</i> | <i>S. cerevisiae</i> V <sub>N</sub> -Fusion Library (Sung <i>et al.</i> 2013) |
| H00401 | <i>MATa his3Δ1 leu2Δ0 met25Δ0 PAM18-V<sub>N</sub>::KIURA3 ura3Δ0</i> | <i>S. cerevisiae</i> V <sub>N</sub> -Fusion Library (Sung <i>et al.</i> 2013) |
| H00379 | <i>MATa CCT2-V<sub>N</sub>::KIURA3 his3Δ1 leu2Δ0 met25Δ0 ura3Δ0</i>  | <i>S. cerevisiae</i> V <sub>N</sub> -Fusion Library (Sung <i>et al.</i> 2013) |
| H00380 | <i>MATa CCT3-V<sub>N</sub>::KIURA3 his3Δ1 leu2Δ0 met25Δ0 ura3Δ0</i>  | <i>S. cerevisiae</i> V <sub>N</sub> -Fusion Library (Sung <i>et al.</i> 2013) |
| H00380 | <i>MATa CCT4-V<sub>N</sub>::KIURA3 his3Δ1 leu2Δ0 met25Δ0 ura3Δ0</i>  | <i>S. cerevisiae</i> V <sub>N</sub> -Fusion Library (Sung <i>et al.</i> 2013) |
| H00391 | <i>MATa GIM4-V<sub>N</sub>::KIURA3 his3Δ1 leu2Δ0 met25Δ0 ura3Δ0</i>  | <i>S. cerevisiae</i> V <sub>N</sub> -Fusion Library (Sung <i>et al.</i> 2013) |
| H00390 | <i>MATa GIM5-V<sub>N</sub>::KIURA3 his3Δ1 leu2Δ0 met25Δ0 ura3Δ0</i>  | <i>S. cerevisiae</i> V <sub>N</sub> -Fusion Library (Sung <i>et al.</i> 2013) |
| H00393 | <i>MATa PFD1-V<sub>N</sub>::KIURA3 his3Δ1 leu2Δ0 met25Δ0 ura3Δ0</i>  | <i>S. cerevisiae</i> V <sub>N</sub> -Fusion Library (Sung <i>et al.</i> 2013) |
| H00389 | <i>MATa his3Δ1 leu2Δ0 met25Δ0 ura3Δ0 YKE2-V<sub>N</sub>::KIURA3</i>  | <i>S. cerevisiae</i> V <sub>N</sub> -Fusion Library (Sung <i>et al.</i> 2013) |
| H00405 | <i>MATa his3Δ1 leu2Δ0 LHS1-V<sub>N</sub>::KIURA3 met25Δ0 ura3Δ0</i>  | <i>S. cerevisiae</i> V <sub>N</sub> -Fusion Library (Sung <i>et al.</i> 2013) |
| H03367 | <i>MATa his3Δ1 JID1-V<sub>N</sub>::KIURA3 leu2Δ0 met25Δ0 ura3Δ0</i>  | <i>S. cerevisiae</i> V <sub>N</sub> -Fusion Library (Sung <i>et al.</i> 2013) |
| H03970 | <i>MATa his3Δ1 HLJ1-V<sub>N</sub>::KIURA3 leu2Δ0 met25Δ0 ura3Δ0</i>  | <i>S. cerevisiae</i> V <sub>N</sub> -Fusion Library (Sung <i>et al.</i> 2013) |
| H05688 | <i>MATa his3Δ1 SEC63-V<sub>N</sub>::KIURA3 leu2Δ0 met25Δ0 ura3Δ0</i> | <i>S. cerevisiae</i> V <sub>N</sub> -Fusion Library (Sung <i>et al.</i> 2013) |
| H01527 | <i>MATa ECM10-V<sub>N</sub>::KIURA3 his3Δ1 leu2Δ0 met25Δ0 ura3Δ0</i> | <i>S. cerevisiae</i> V <sub>N</sub> -Fusion Library (Sung <i>et al.</i> 2013) |
| H01444 | <i>MATa his3Δ1 leu2Δ0 met25Δ0 SSQ1-V<sub>N</sub>::KIURA3 ura3Δ0</i>  | <i>S. cerevisiae</i> V <sub>N</sub> -Fusion Library (Sung <i>et al.</i> 2013) |
| H04280 | <i>MATa his3Δ1 JAC1-V<sub>N</sub>::KIURA3 leu2Δ0 met25Δ0 ura3Δ0</i>  | <i>S. cerevisiae</i> V <sub>N</sub> -Fusion Library (Sung <i>et al.</i> 2013) |

| Strain | Genotype                                                             | Origin                                                                        |
|--------|----------------------------------------------------------------------|-------------------------------------------------------------------------------|
| H05828 | <i>MATa his3Δ1 leu2Δ0 MDJ1-V<sub>N</sub>::KIURA3 met25Δ0 ura3Δ0</i>  | <i>S. cerevisiae</i> V <sub>N</sub> -Fusion Library (Sung <i>et al.</i> 2013) |
| H01128 | <i>MATa his3Δ1 HSP78-V<sub>N</sub>::KIURA3 leu2Δ0 met25Δ0 ura3Δ0</i> | <i>S. cerevisiae</i> V <sub>N</sub> -Fusion Library (Sung <i>et al.</i> 2013) |
| H01972 | <i>MATa his3Δ1 leu2Δ0 MCX1-V<sub>N</sub>::KIURA3 met25Δ0 ura3Δ0</i>  | <i>S. cerevisiae</i> V <sub>N</sub> -Fusion Library (Sung <i>et al.</i> 2013) |
| H01842 | <i>MATa his3Δ1 HSP60-V<sub>N</sub>::KIURA3 leu2Δ0 met25Δ0 ura3Δ0</i> | <i>S. cerevisiae</i> V <sub>N</sub> -Fusion Library (Sung <i>et al.</i> 2013) |

## Literature cited

- Brachmann R. K., M. Vidal, and J. D. Boeke, 1996 Dominant-negative p53 mutations selected in yeast hit cancer hot spots. *Proc Natl Acad Sci U S A* 93: 4091–4095. <https://doi.org/10.1073/pnas.93.9.4091>
- Giaever G., A. M. Chu, L. Ni, C. Connelly, L. Riles, *et al.*, 2002 Functional profiling of the *Saccharomyces cerevisiae* genome. *Nature* 418: 387–391. <https://doi.org/10.1038/nature00935>
- Huang T., B. J. Barclay, T. I. Kalman, R. C. von Borstel, and P. J. Hastings, 1992 The phenotype of a dihydrofolate reductase mutant of *Saccharomyces cerevisiae*. *Gene* 121: 167–171. [https://doi.org/10.1016/0378-1119\(92\)90177-q](https://doi.org/10.1016/0378-1119(92)90177-q)
- Ishioka C., T. Frebourg, Y. X. Yan, M. Vidal, S. H. Friend, *et al.*, 1993 Screening patients for heterozygous p53 mutations using a functional assay in yeast. *Nat Genet* 5: 124–129. <https://doi.org/10.1038/ng1093-124>
- Jones E. W., 1977 Proteinase mutants of *Saccharomyces cerevisiae*. *Genetics* 85: 23–33.
- Nagaraj S., A. Rajendran, C. E. Jackson, and M. S. Longtine, 2008 Role of nucleotide binding in septin-septin interactions and septin localization in *Saccharomyces cerevisiae*. *Mol. Cell. Biol* 28: 5120–5137. <https://doi.org/10.1128/MCB.00786-08>
- Oh Y., J. Schreiter, R. Nishihama, C. Wloka, and E. Bi, 2013 Targeting and functional mechanisms of the cytokinesis-related F-BAR protein Hof1 during the cell cycle. *Mol. Biol. Cell* 24: 1305–1320. <https://doi.org/10.1091/mbc.E12-11-0804>
- Sung M.-K., G. Lim, D.-G. Yi, Y. J. Chang, E. B. Yang, *et al.*, 2013 Genome-wide bimolecular fluorescence complementation analysis of SUMO interactome in yeast. *Genome Res* 23: 736–746. <https://doi.org/10.1101/gr.148346.112>

- Weems A. D., and M. A. McMurray, 2017 The step-wise pathway of septin hetero-octamer assembly in budding yeast. *Elife* 6. <https://doi.org/10.7554/eLife.23689>
- Winzler E. A., D. D. Shoemaker, A. Astromoff, H. Liang, K. Anderson, *et al.*, 1999 Functional characterization of the *S. cerevisiae* genome by gene deletion and parallel analysis. *Science* 285: 901–906.  
<https://doi.org/10.1126/science.285.5429.901>
