# Supplementary material
Source: publisher figshare collection journal article supplement (https://gsajournals.figshare.com/articles/dataset/_/14673309)
Supplement: Supplementary file 6 [file 1]

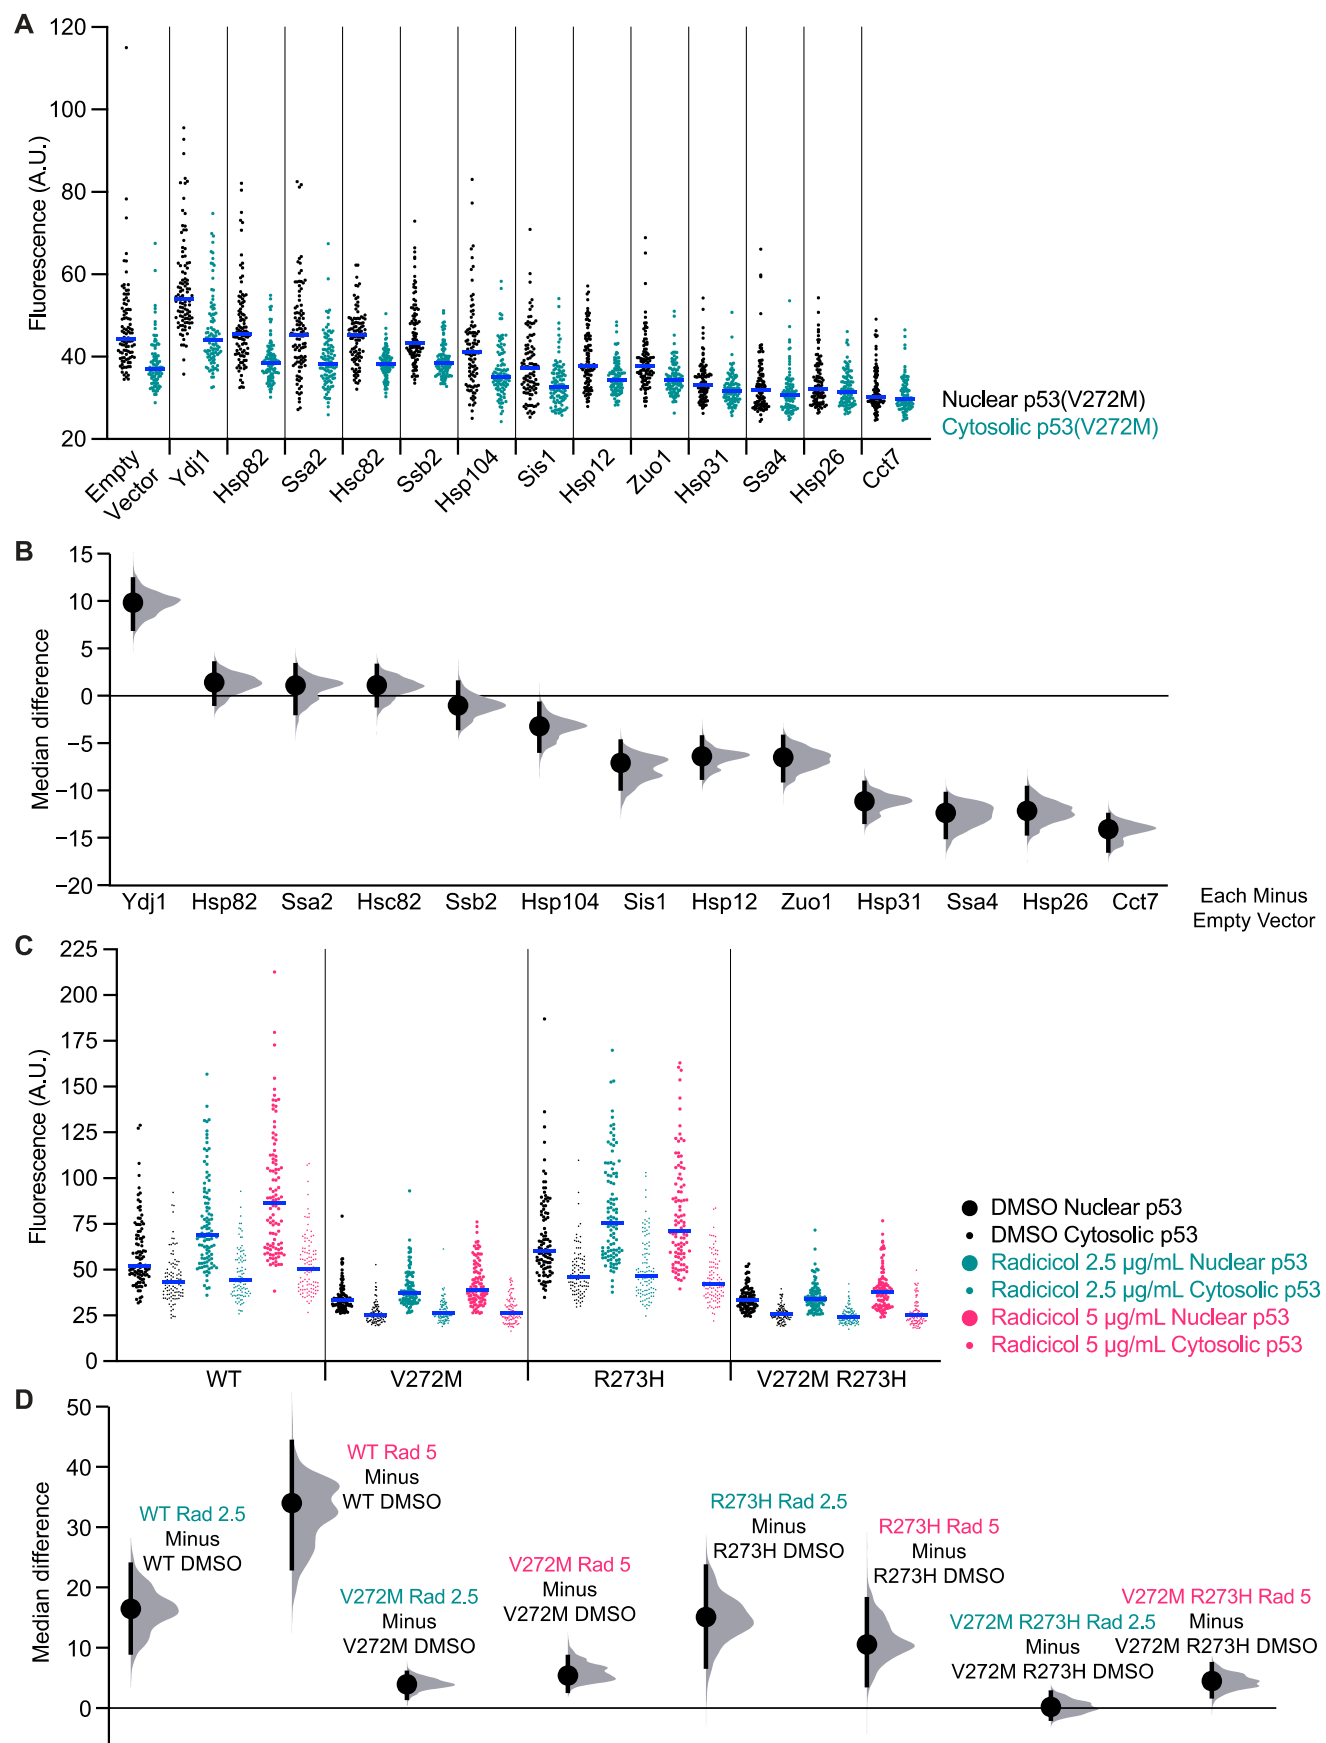

**Figure S5. Raw nuclear and cytosolic p53 levels in chaperone-overexpressing cells and Hsp90-inhibited cells**

(A) Nuclear and cytosolic mKate2 fluorescence in diploid cells carrying a plasmid encoding p53(V272M)-mKate2-Venus together with the indicated *GAL 1/10*-driven chaperone plasmid or an empty vector. Cells were grown to mid-log phase at 30° with galactose to overexpress chaperones prior to imaging. Blue lines denote median values. Vertical lines separate genotypes. Plasmids were pMAM86, “p53(V272M)”; pRS424, “Empty Vector”; G00353, “Ydj1”; G00630, “Hsp82”; G00633, “Ssa2”; G00799, “Hsc82”; G00634, “Ssb2”; G00631, “Hsp104”; G00632, “Sis1”; G00627, “Hsp12”; G00635, “Zuo1”; G00629, “Hsp31”; G00789, “Ssa4”; G00628, “Hsp26”; G00620, “Cct7”. Strains were diploids made by mating yJM3164 cells carrying pMAM86 with yJM1838 cells carrying the indicated *GAL 1/10*-driven chaperone plasmid or empty vector. (B) For the data in (A), the median difference for nuclear mKate2 comparisons between chaperone-overexpressing cells and empty vector are shown in Cumming estimation plots as bootstrap sampling distributions. Each median difference is depicted as a dot. Each 95% confidence interval is indicated by the ends of the vertical error bars. (C) Nuclear and cytosolic mKate2 fluorescence in yJM3164 cells carrying plasmids encoding the indicated alleles of p53-mKate2-Venus. Cells were grown to mid-log phase at 37° with the indicated concentration of radicicol or equivalent volume of DMSO prior to imaging. Blue lines denote median values. Vertical lines separate genotypes. Plasmids were pMAM85, “WT”; pMAM86, “V272M”; pMAM87, “R273H”; pMAM104, “V272M R273H”. (D) For the data in (C), the median difference for nuclear mKate2 comparisons between radicicol- and DMSO-treated cells are shown in Cumming estimation plots as bootstrap sampling distributions. Each median difference is depicted as a dot. Each 95% confidence interval is indicated by the ends of the vertical error bars.
