# Supplementary material
Source: publisher figshare collection journal article supplement (https://gsajournals.figshare.com/articles/dataset/_/14673309)
Supplement: Supplementary file 7 [file 1]

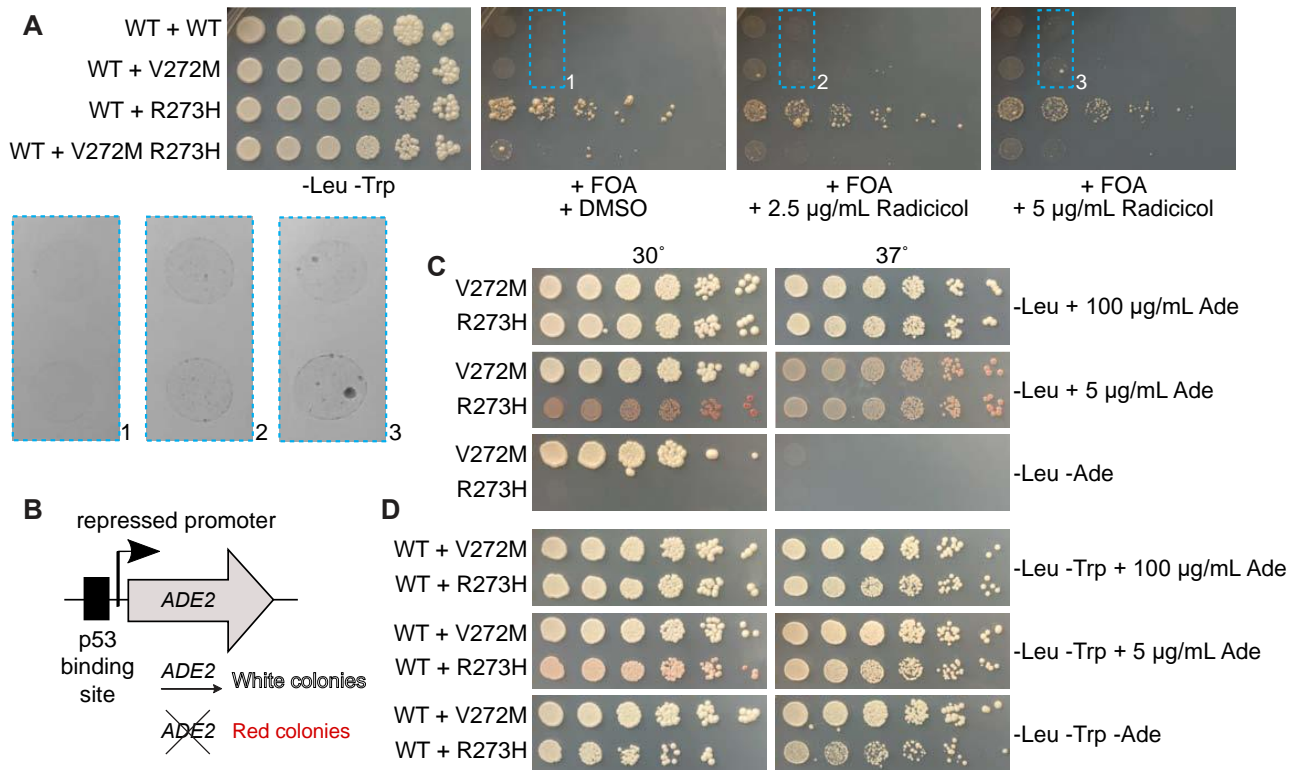

**Figure S6. Assays to detect dominance upon Hsp90 inhibition**

(A) Colony growth at 37° of diploid cells carrying plasmids encoding the indicated alleles of p53, together with WT p53 plasmid, on solid medium selective for the plasmids “-Leu -Trp” or selective for the plasmids and counter-selective for p53 reporter activity “-Leu -Trp + FOA” and containing the indicated concentration of radicicol or equivalent volume of DMSO. Magnified images were inverted and adjusted for brightness and contrast in an equivalent manner. Plasmids were pLS76, “WT”; pMAM69, “V272M”; pMAM79, “R273H”; pMAM77, “V272M R273H”. Strains were diploids made by mating RBy33 cells carrying pLS76, pMAM69, pMAM79, or pMAM77 with RBy159 cells carrying pMAM78. (B) Schematic of *ADE2*-based p53 reporter strain yIG397. Binding of properly folded p53 to a repressed promoter activates transcription of *ADE2*, leading to white colony growth on low-adenine-containing medium. (C) Colony growth at 30° or 37° of haploid yIG397 cells carrying plasmids encoding the indicated alleles of p53 on solid medium selective for the plasmids “-Leu + 100 µg/mL Ade” or selective for the plasmids and selective for p53 reporter activity “-Leu -Ade” or selective for the plasmids and discriminatory for p53 reporter activity “-Leu + 5 µg/mL Ade”. Plasmids were pMAM69, “V272M”; pMAM79, “R273H”. (D) Colony growth at 30° or 37° of haploid yIG397 cells carrying plasmids encoding the indicated alleles of p53, together with WT p53 plasmid, on solid medium selective for the plasmids “-Leu -Trp + 100 µg/mL Ade” or selective for the plasmids and selective for p53 reporter activity “-Leu -Trp -Ade” or selective for the plasmids and discriminatory for p53 reporter activity “-Leu -Trp + 5 µg/mL Ade”. Plasmids were pLS76, “WT”; pMAM69, “V272M”; pMAM79, “R273H”.
